# Supplementary material
Source: ML conference proceedings conference paper supplement (https://openreview.net/forum?id=4dARndGskg)

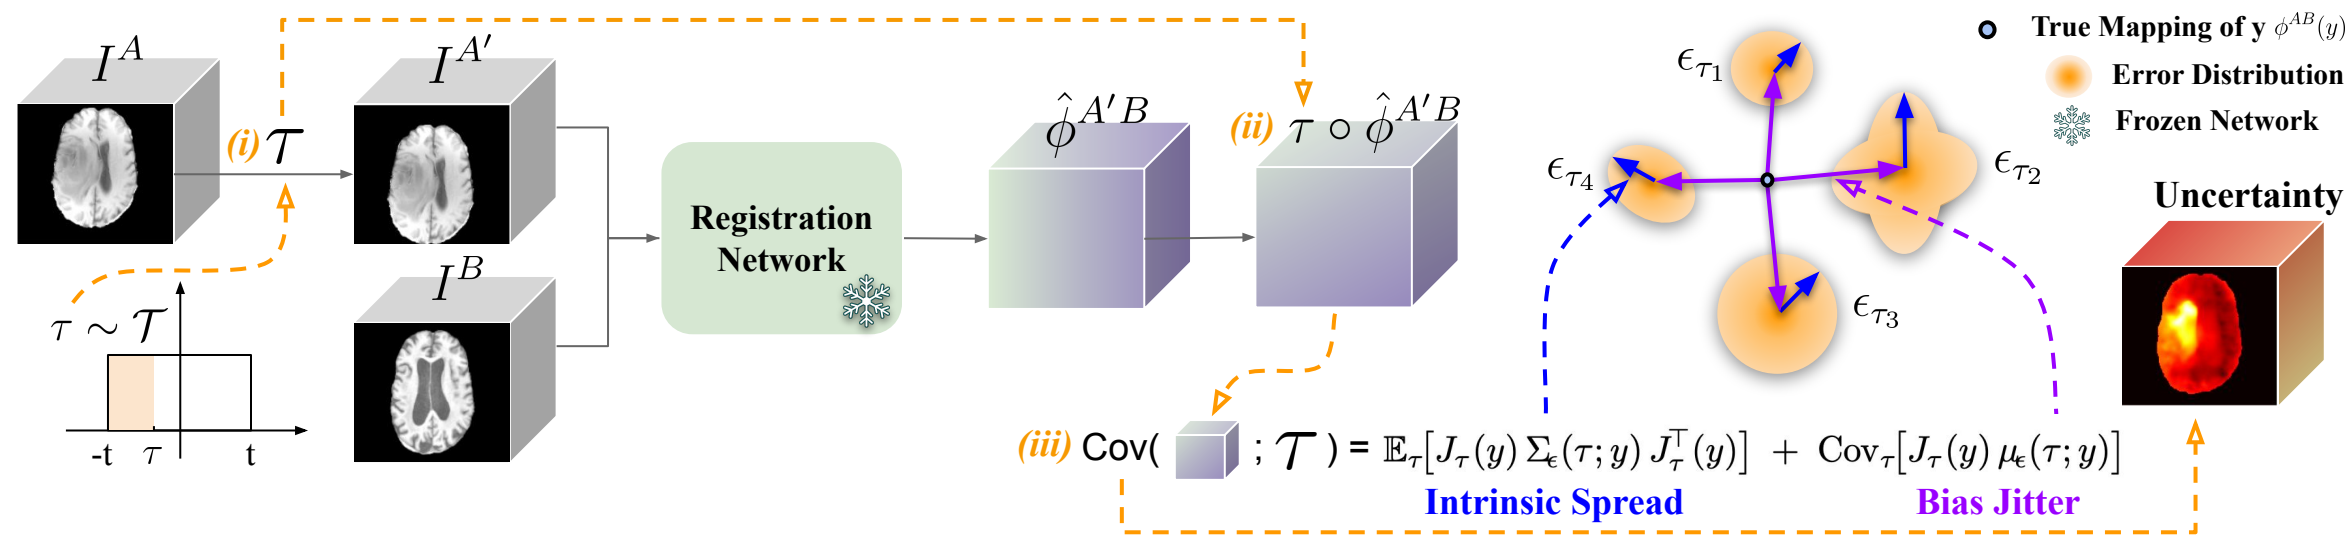

Supplement: supplementary_material [file teaser.pdf › Supplementary/Figures/Figure1/teaser.pdf]

## a) Instance Level

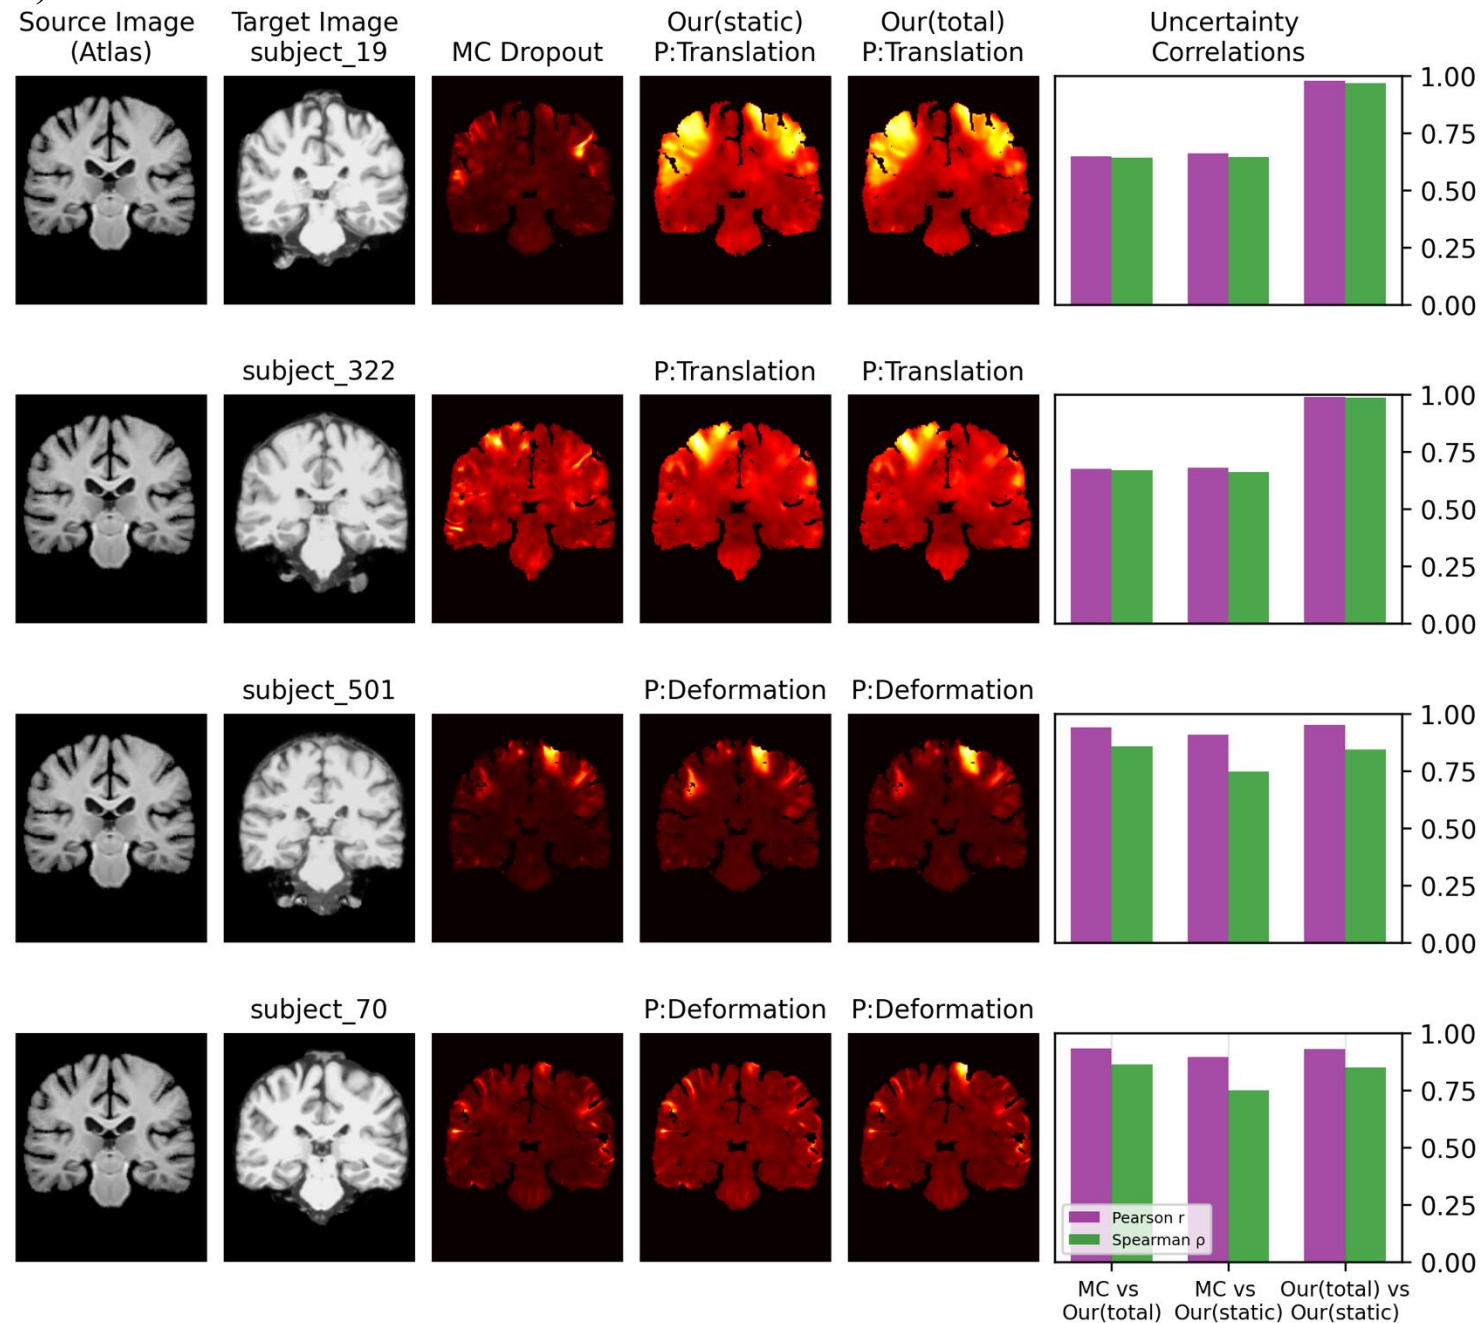

## b) Dataset Level

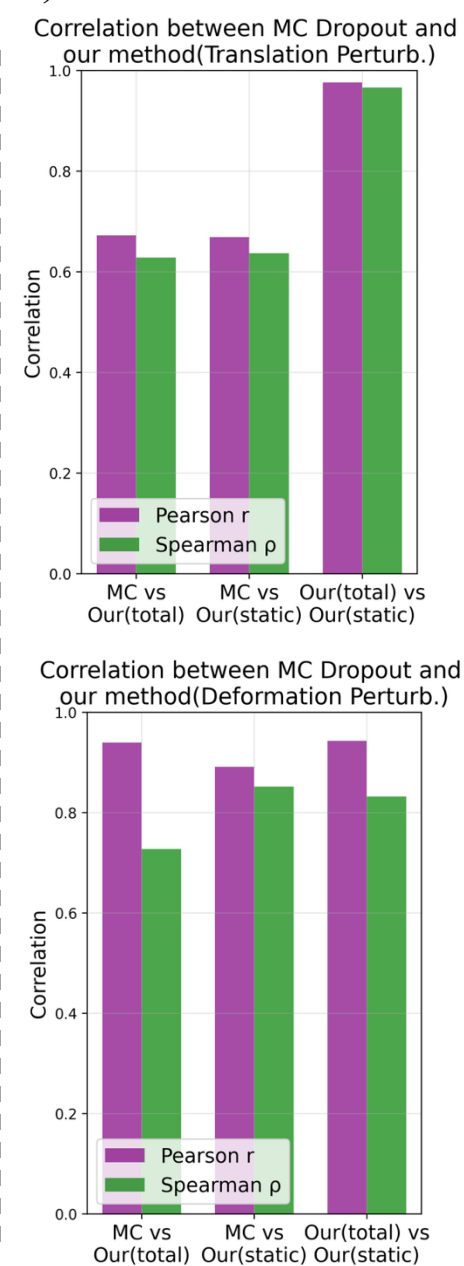

Supplement: supplementary_material [file comparison_with_mc_dropout.pdf › Supplementary/Figures/Figure5/comparison_with_mc_dropout.pdf]
